# Supplementary material for: Internet Delivered Support for Tobacco Control in Dental Practice: Randomized Controlled Trial
Source: PubMed Central journal article supplement (PMC2630831; doi:10.2196/jmir.1095), 2008-11-04
Supplement: jmir_v10i5e38_app2.pdf [file jmir_v10i5e38_app2.pdf]

Multimedia Appendix 2: Supplemental data tables

**Table 1:** Practice Characteristics of 143 practices with and 47 practices without follow-data

|                                                  | With Follow Up (N=143) |      | Without Follow Up (N=47) |      |
|--------------------------------------------------|------------------------|------|--------------------------|------|
|                                                  | n/N                    | %    | n/N                      | %    |
| <b>Practice Type</b>                             |                        |      |                          |      |
| General Practice                                 | 132/143                | 92.3 | 44/47                    | 93.6 |
| Periodontal                                      | 11/143                 | 7.7  | 3/47                     | 6.4  |
| <b>Solo/Group Practice</b>                       |                        |      |                          |      |
| Solo Dental Practice                             | 110/143                | 78.6 | 36/47                    | 76.6 |
| Group Dental Practice                            | 30/143                 | 21.4 | 11/47                    | 23.4 |
| <b>Number of Hygienists and Assistants</b>       |                        |      |                          |      |
| 0 staff                                          | 4/143                  | 2.8  | 2/47                     | 4.3  |
| 1-2 staff                                        | 37/143                 | 25.9 | 13/47                    | 27.7 |
| 3-4 staff                                        | 65/143                 | 45.5 | 20/47                    | 42.6 |
| >4 staff                                         | 37/143                 | 25.9 | 12/47                    | 25.5 |
| <b>Number of Years at this practice(Dentist)</b> |                        |      |                          |      |
| <5 years                                         | 23/143                 | 17.4 | 7/47                     | 15.9 |
| 5-10 years                                       | 25/143                 | 18.9 | 6/47                     | 13.6 |
| >10 years                                        | 84/143                 | 63.6 | 31/47                    | 70.5 |
| <b>Urban or Non-urban</b>                        |                        |      |                          |      |
| Urban over 1 million                             | 48/143                 | 33.6 | 17/47                    | 36.2 |
| Other metro                                      | 71/143                 | 49.7 | 22/47                    | 46.8 |
| Non-metro                                        | 24/143                 | 16.8 | 8/47                     | 17.0 |
| <b>Practice busyness</b>                         |                        |      |                          |      |
| Too busy to treat all                            | 15/143                 | 10.6 | 5/47                     | 10.9 |
| Overburdened                                     | 13/143                 | 9.2  | 7/47                     | 15.2 |
| Not overburdened                                 | 95/143                 | 66.9 | 24/47                    | 52.2 |
| Not busy enough                                  | 19/143                 | 13.4 | 10/47                    | 21.7 |
| <b>State</b>                                     |                        |      |                          |      |
| AL                                               | 36/143                 | 25.2 | 10/47                    | 21.3 |
| FL                                               | 48/143                 | 33.6 | 19/47                    | 40.4 |
| GA                                               | 39/143                 | 27.3 | 12/47                    | 25.5 |
| NC                                               | 20/143                 | 14.0 | 6/47                     | 12.8 |
| <b>Number of Patients Visits Per Week</b>        |                        |      |                          |      |
| <=40 patients/week                               | 12/143                 | 8.4  | 7/47                     | 14.9 |
| 40-100 patients/week                             | 94/143                 | 65.7 | 28/47                    | 59.6 |
| >100 patients/week                               | 37/143                 | 25.9 | 12/47                    | 25.5 |

Note: No comparisons are significant at p=0.05 level

Data also available at <http://www.dpbrn.org/users/publications/Supplement.aspx>

**Table 2:** Pre-intervention patient-reported provider performance comparing 143 practices with and 47 without Wave 2 Data

|              | <b>With Follow Up<br/>(N=143 practices)</b> |          | <b>Without Follow Up<br/>(N=47 practices)</b> |          |
|--------------|---------------------------------------------|----------|-----------------------------------------------|----------|
|              | <b>n/N</b>                                  | <b>%</b> | <b>n/N</b>                                    | <b>%</b> |
| ASK_SMOKE    | 3421/11898                                  | 28.8     | 1158/3741                                     | 31.0     |
| ADVISE_SMOKE | 1377/3287                                   | 41.9     | 464/1119                                      | 41.5     |

Data also available at <http://www.dpbrn.org/users/publications/Supplement.aspx>
